# Supplementary material for: Embryonic Stem Cell Proliferation Stimulated By Altered Anabolic Metabolism From Glucose Transporter 2-Transported Glucosamine
Source: PubMed Central journal article supplement (PMC4911601; doi:10.1038/srep28452), 2016-06-17
Supplement: srep28452-s1.pdf [file srep28452-s1.pdf]

## **SUPPLEMENTARY INFORMATION**

# **Embryonic Stem Cell Proliferation Stimulated By Altered Anabolic Metabolism From Glucose Transporter 2-Transported Glucosamine**

**Jin Hyuk Jung, Kumiko Iwabuchi, Zhihong Yang, and Mary R. Loeken**

### **List of Supplementary Materials**

#### **Supplementary Tables**

Supplementary Table 1, related to Figure 1

Supplementary Table 2, related to Figure 5

Supplementary Table 3, related to Methods

Supplementary Table 4, related to Methods

#### **Supplementary Methods**

#### **Supplementary References**

## Supplementary Table 1 (Related to Figure 1)

### Y and Autosomal Genotype Results

| Cell line | <i>Zfy</i> | <i>Glut2</i> |
|-----------|------------|--------------|
| LG-ESC    | +          | +            |
| LG-ESC-2  | -          | +            |
| LG-ESC-3  | -          | +            |
| D3 ESC    | +          | +            |

**SUPPLEMENTARY DATA**  
**Supplementary Table 2 (Related to Figure 5)**

| Heat map of statistically significant biochemicals profiled in this study. |               |                                             |                         |          |         |        |         | ANOVA Contrasts |         |         |         | Two-Way ANOVA       |                         |                                 | Statistical Values          |         |                             |         |                             |         |                             |         |                     |         |                         |         |                                 |         |        |        |        |
|----------------------------------------------------------------------------|---------------|---------------------------------------------|-------------------------|----------|---------|--------|---------|-----------------|---------|---------|---------|---------------------|-------------------------|---------------------------------|-----------------------------|---------|-----------------------------|---------|-----------------------------|---------|-----------------------------|---------|---------------------|---------|-------------------------|---------|---------------------------------|---------|--------|--------|--------|
| Pathway Sort Order                                                         | Super Pathway | Sub Pathway                                 | Biochemical Name        | Platform | Comp ID | REGG   | HMDB    | Field of Change |         |         |         | Glucose Main Effect | Glucosamine Main Effect | Glucose-Glucosamine Interaction | [YGLU+YGLCN] / (YGLU+YGLCN) |         | [YGLU+YGLCN] / (YGLU+YGLCN) |         | [YGLU+YGLCN] / (YGLU+YGLCN) |         | [YGLU+YGLCN] / (YGLU+YGLCN) |         | Glucose Main Effect |         | Glucosamine Main Effect |         | Glucose-Glucosamine Interaction |         |        |        |        |
|                                                                            |               |                                             |                         |          |         |        |         | q-value         | q-value | q-value | q-value |                     |                         |                                 | p-value                     | q-value | p-value                     | q-value | p-value                     | q-value | p-value                     | q-value | p-value             | p-value | q-value                 | p-value | q-value                         | p-value |        |        |        |
| 38                                                                         |               | Glycolysis                                  | phosphoenolpyruvate     | LCMS pos | 37      | CG0026 | HEALTHY | 1.46            | 1.12    | 0.39    | 0.61    |                     |                         |                                 | 0.0102                      | 0.0185  | 0.5379                      | 0.1213  | 0.0000                      | 0.0000  | 0.0079                      | 0.1481  | 0.0000              | 0.0000  | 0.1338                  | 0.0449  | 0.0237                          | 0.0138  |        |        |        |
| 37                                                                         |               | Glycolysis                                  | pyruvate                | LCMS pos | 53      | CG0026 | HEALTHY | 0.62            | 0.81    | 0.62    | 0.62    |                     |                         |                                 | 0.0398                      | 0.0473  | 0.3681                      | 0.0000  | 0.0000                      | 0.0000  | 0.0118                      | 0.1629  | 0.0001              | 0.0001  | 0.0380                  | 0.0196  | 0.3773                          | 0.1368  |        |        |        |
| 206                                                                        | Amino Acid    | Urea cycle, Arginine and Proline Metabolism | arginine                | LCMS pos | 1638    | CG0026 | HEALTHY | 0.49            | 0.82    | 0.67    | 1.15    |                     |                         |                                 | 0.0229                      | 0.0337  | 0.3087                      | 0.0791  | 0.0000                      | 0.0000  | 0.0029                      | 0.4280  | 0.0063              | 0.8833  | 0.2773                  | 0.0220  | 0.0118                          | 0.3260  | 0.1223 |        |        |
| 209                                                                        |               |                                             | ornithine               | GCMS     | 1463    | CG0027 | HEALTHY | 0.60            | 1.08    | 0.21    | 0.64    |                     |                         |                                 | 0.0068                      | 0.0151  | 0.0025                      | 0.0011  | 0.0000                      | 0.0000  | 0.0325                      | 0.3352  | 0.0000              | 0.0000  | 0.7632                  | 0.1996  | 0.0002                          | 0.0002  | 0.0002 |        |        |
| 259                                                                        |               |                                             | proline                 | LCMS pos | 1898    | CG0026 | HEALTHY | 1.70            | 1.44    | 0.37    | 0.79    |                     |                         |                                 | 0.0359                      | 0.0462  | 0.5400                      | 0.0135  | 0.0000                      | 0.0000  | 0.0000                      | 0.0000  | 0.0000              | 0.0000  | 0.0000                  | 0.0000  | 0.0000                          | 0.0000  | 0.0000 | 0.0000 |        |
| 731                                                                        |               |                                             | glutamate               | GCMS     | 36597   | CG0026 | HEALTHY | 1.08            | 0.42    | 0.19    | 0.87    |                     |                         |                                 | 0.4002                      | 0.2227  | 0.0000                      | 0.0000  | 0.0000                      | 0.0000  | 0.7465                      | 0.0063  | 0.0000              | 0.0000  | 0.0000                  | 0.0000  | 0.0000                          | 0.0000  | 0.0000 | 0.0000 |        |
| 732                                                                        |               |                                             | glutamate-5-phospho     | GCMS     | 31263   | CG0026 | HEALTHY | 1.11            | 1.75    | 0.36    | 0.80    |                     |                         |                                 | 0.4533                      | 0.2465  | 0.0003                      | 0.0002  | 0.0000                      | 0.0000  | 0.0000                      | 0.5583  | 0.4307              | 0.0000  | 0.0000                  | 0.0017  | 0.0014                          | 0.0197  | 0.0118 |        |        |
| 735                                                                        |               |                                             | fructose-6-phospho      | GCMS     | 12021   | CG0026 | HEALTHY | 1.00            | 0.22    | 0.16    | 0.58    |                     |                         |                                 | 0.0608                      | 0.4024  | 0.0000                      | 0.0000  | 0.0000                      | 0.0000  | 0.7827                      | 0.0063  | 0.0000              | 0.0000  | 0.0000                  | 0.0000  | 0.0000                          | 0.0000  | 0.0000 | 0.0000 |        |
| 742                                                                        |               |                                             | 1,3-bisphosphoglycerate | GCMS     | 35983   | CG0026 | HEALTHY | 1.08            | 1.35    | 0.43    | 0.89    |                     |                         |                                 | 0.8889                      | 0.3212  | 0.0035                      | 0.0014  | 0.0001                      | 0.0000  | 0.0000                      | 0.0000  | 0.0000              | 0.0000  | 0.0001                  | 0.0001  | 0.0160                          | 0.0000  | 0.0000 | 0.0000 |        |
| 746                                                                        |               |                                             | pyruvate                | GCMS     | 527     | CG0026 | HEALTHY | 1.03            | 1.07    | 0.49    | 0.78    |                     |                         |                                 | 0.6559                      | 0.3711  | 0.0107                      | 0.0047  | 0.0001                      | 0.0000  | 0.0000                      | 0.0000  | 0.0000              | 0.0000  | 0.0000                  | 0.0000  | 0.0000                          | 0.0000  | 0.0000 | 0.0000 |        |
| 751                                                                        | Carbohydrate  |                                             | pyruvate                | GCMS     | 1972    | CG0026 | HEALTHY | 1.91            | 1.59    | 0.72    | 0.71    |                     |                         |                                 | 0.0097                      | 0.0891  | 0.0000                      | 0.0000  | 0.0000                      | 0.0000  | 0.0000                      | 0.0000  | 0.0000              | 0.0000  | 0.0000                  | 0.0000  | 0.0000                          | 0.0000  | 0.0000 | 0.0000 |        |
| 756                                                                        |               |                                             | fructose-1,6-bisphospho | GCMS     | 581     | CG0026 | HEALTHY | 1.33            | 2.48    | 0.40    | 0.72    |                     |                         |                                 | 0.1848                      | 0.1321  | 0.0037                      | 0.0070  | 0.1488                      | 0.0290  | 0.2500                      | 0.0002  | 0.0719              | 0.0338  | 0.0348                  | 0.0178  | 0.0245                          | 0.2458  | 0.0670 |        |        |
| 759                                                                        |               |                                             | sedoheptulose-7-phospho | GCMS     | 35840   | CG0026 | HEALTHY | 1.41            | 2.01    | 0.39    | 0.82    |                     |                         |                                 | 0.1124                      | 0.1033  | 0.0072                      | 0.0008  | 0.0048                      | 0.0012  | 0.2854                      | 0.0063  | 0.0088              | 0.0040  | 0.0010                  | 0.0010  | 0.1543                          | 0.0870  | 0.0870 |        |        |
| 765                                                                        |               |                                             | fructose                | GCMS     | 12080   | CG0026 | HEALTHY | 1.01            | 1.60    | 0.18    | 1.00    |                     |                         |                                 | 0.2384                      | 0.1738  | 0.0000                      | 0.0000  | 0.0000                      | 0.0000  | 0.0000                      | 0.0000  | 0.0000              | 0.0000  | 0.0000                  | 0.0000  | 0.0000                          | 0.0000  | 0.0000 | 0.0000 |        |
| 873                                                                        |               |                                             | glucosamine             | GCMS     | 18534   | CG0026 | HEALTHY | 1.42            | 1.42    | 0.36    | 1.48    |                     |                         |                                 | 0.0393                      | 0.0462  | 0.0001                      | 0.0001  | 1.0000                      | 0.1514  | 0.0232                      | 0.0047  | 0.0075              | 0.0448  | 0.0001                  | 0.0001  | 0.0075                          | 0.0451  | 0.0451 |        |        |
| 883                                                                        |               |                                             | N-acetylglucosamine     | LCMS neg | 18107   | CG0026 | HEALTHY | 2.38            | 13.88   | 0.18    | 1.09    |                     |                         |                                 | 0.0000                      | 0.0002  | 0.0000                      | 0.0000  | 0.0000                      | 0.0000  | 0.0000                      | 0.0000  | 0.0000              | 0.0000  | 0.0000                  | 0.0000  | 0.0000                          | 0.0000  | 0.0000 | 0.0000 |        |
| 908                                                                        |               |                                             | glucose                 | GCMS     | 1584    | CG0026 | HEALTHY | 0.96            | 0.75    | 0.12    | 0.94    |                     |                         |                                 | 0.7077                      | 0.3290  | 0.0000                      | 0.0000  | 0.0000                      | 0.0000  | 0.0000                      | 0.0000  | 0.1481              | 0.0000  | 0.0000                  | 0.0000  | 0.0000                          | 0.0000  | 0.0000 | 0.0000 |        |
| 917                                                                        |               |                                             | fructose                | GCMS     | 1643    | CG0026 | HEALTHY | 0.83            | 0.68    | 0.49    | 0.85    |                     |                         |                                 | 0.0302                      | 0.0348  | 0.0004                      | 0.1186  | 0.0033                      | 0.0000  | 0.0000                      | 0.0000  | 0.0000              | 0.0000  | 0.0000                  | 0.0000  | 0.0000                          | 0.0000  | 0.0000 | 0.0000 |        |
| 918                                                                        | Energy        | TCA Cycle                                   | malate                  | GCMS     | 1303    | CG0026 | HEALTHY | 0.89            | 0.97    | 0.19    | 0.48    |                     |                         |                                 | 0.4009                      | 0.2321  | 0.0000                      | 0.0000  | 0.0000                      | 0.0000  | 0.0000                      | 0.0000  | 0.0000              | 0.0000  | 0.0000                  | 0.0000  | 0.0000                          | 0.0000  | 0.0000 | 0.0000 |        |
| 928                                                                        |               |                                             | pyrophosphate (PPi)     | GCMS     | 2078    | CG0026 | HEALTHY | 0.94            | 1.11    | 0.88    | 0.80    |                     |                         |                                 | 0.7133                      | 0.3298  | 0.8739                      | 0.1722  | 0.2659                      | 0.0475  | 0.5318                      | 0.0063  | 0.2162              | 0.0881  | 0.8824                  | 0.2102  | 0.7100                          | 0.2288  | 0.2288 |        |        |
| 929                                                                        |               |                                             | phosphoenolpyruvate     | GCMS     | 11438   | CG0026 | HEALTHY | 0.87            | 0.89    | 1.07    | 0.90    |                     |                         |                                 | 0.3089                      | 0.1973  | 0.0084                      | 0.0256  | 0.7187                      | 0.1142  | 0.8978                      | 0.0063  | 0.0841              | 0.3005  | 0.0577                  | 0.0204  | 0.0979                          | 0.1078  | 0.1078 |        |        |
| 2064                                                                       |               |                                             | glucosamine             | LCMS pos | 568     | CG0026 | HEALTHY | 0.97            | 1.26    | 0.79    | 1.00    |                     |                         |                                 | 0.0373                      | 0.1698  | 0.1833                      | 0.0388  | 0.0084                      | 0.0022  | 0.7882                      | 0.0063  | 0.0339              | 0.0142  | 0.7347                  | 0.1952  | 0.0781                          | 0.0382  | 0.0382 |        |        |
| 2065                                                                       |               |                                             | serine                  | GCMS     | 554     | CG0026 | HEALTHY | 0.43            | 0.78    | 0.38    | 1.01    |                     |                         |                                 | 0.0049                      | 0.0125  | 0.0013                      | 0.0006  | 0.0000                      | 0.0000  | 0.7300                      | 0.0063  | 0.0000              | 0.0000  | 0.6832                  | 0.1980  | 0.0001                          | 0.0001  | 0.0001 |        |        |
| 2095                                                                       |               |                                             | glucosamine             | LCMS pos | 1973    | CG0026 | HEALTHY | 0.81            | 0.83    | 0.14    | 0.97    |                     |                         |                                 | 0.0418                      | 0.0462  | 0.0000                      | 0.0000  | 0.0000                      | 0.0000  | 0.0000                      | 0.0000  | 0.0000              | 0.0000  | 0.0000                  | 0.0000  | 0.0000                          | 0.0000  | 0.0000 | 0.0000 |        |
| 2095                                                                       |               |                                             | glucosamine             | LCMS pos | 32352   | CG0026 | HEALTHY | 0.70            | 0.97    | 0.82    | 1.01    |                     |                         |                                 | 0.0310                      | 0.0411  | 0.8189                      | 0.1834  | 0.0487                      | 0.0100  | 0.9760                      | 0.0063  | 0.1441              | 0.0825  | 0.0861                  | 0.0362  | 0.1552                          | 0.0870  | 0.0870 |        |        |
| 2127                                                                       |               |                                             | serine                  | LCMS neg | 808     | CG0026 | HEALTHY | 0.64            | 0.70    | 0.29    | 0.80    |                     |                         |                                 | 0.0315                      | 0.0697  | 0.0000                      | 0.0000  | 0.0000                      | 0.0000  | 0.4411                      | 0.0063  | 0.0000              | 0.0000  | 0.0000                  | 0.0000  | 0.0000                          | 0.0000  | 0.0000 | 0.0000 |        |
| 2128                                                                       |               |                                             | uracil                  | GCMS     | 805     | CG0026 | HEALTHY | 1.11            | 0.72    | 0.33    | 1.00    |                     |                         |                                 | 0.0001                      | 0.0006  | 0.0000                      | 0.0000  | 0.0000                      | 0.0000  | 0.0000                      | 0.0000  | 0.0000              | 0.0000  | 0.0000                  | 0.0000  | 0.0000                          | 0.0000  | 0.0000 | 0.0000 | 0.0000 |
| 2149                                                                       |               |                                             | cytosine 2-imino        | LCMS pos | 2372    | CG0026 | HEALTHY | 1.09            | 0.88    | 0.27    | 0.80    |                     |                         |                                 | 0.0005                      | 0.2015  | 0.0000                      | 0.0000  | 0.0000                      | 0.0000  | 0.0000                      | 0.5856  | 0.0063              | 0.0000  | 0.0000                  | 0.0000  | 0.0000                          | 0.0000  | 0.0000 | 0.0000 |        |
| 2152                                                                       |               |                                             | cytosine                | LCMS pos | 514     | CG0026 | HEALTHY | 0.71            | 0.80    | 0.79    | 0.93    |                     |                         |                                 | 0.0028                      | 0.0084  | 0.0046                      | 0.0148  | 0.0229                      | 0.0055  | 0.2451                      | 0.0002  | 0.0178              | 0.0099  | 0.0008                  | 0.0008  | 0.3799                          | 0.1389  | 0.1389 |        |        |
| 2168                                                                       |               |                                             | uracil                  | LCMS neg | 36538   | CG0026 | HEALTHY | 0.87            | 0.44    | 0.18    | 0.80    |                     |                         |                                 | 0.0214                      | 0.1638  | 0.0000                      | 0.0000  | 0.0000                      | 0.0000  | 0.0285                      | 0.3258  | 0.0000              | 0.0000  | 0.0000                  | 0.0000  | 0.0000                          | 0.0000  | 0.0000 | 0.0000 |        |
| 2169                                                                       |               |                                             | uracil                  | GCMS     | 604     | CG0026 | HEALTHY | 0.82            | 0.97    | 0.43    | 0.62    |                     |                         |                                 | 0.3190                      | 0.1973  | 0.0434                      | 0.0144  | 0.0001                      | 0.0000  | 0.1229                      | 0.7035  | 0.0002              | 0.0002  | 0.4383                  | 0.1390  | 0.0096                          | 0.0102  | 0.0102 |        |        |

### Supplementary Table 3 (Related to Methods)

#### Immunoblot Antibodies

| Antibody                      | Dilution | Species | Source                              |
|-------------------------------|----------|---------|-------------------------------------|
| Anti-GLUT1                    | 1:500    | Mouse   | Abcam (ab40084)                     |
| Anti-GLUT2                    | 1:1000   | Rabbit  | Santa Cruz Biotechnology (sc-9117)  |
| Anti-GLUT3                    | 1:1000   | Mouse   | Santa Cruz Biotechnology (sc-74399) |
| Anti-PCNA                     | 1:2000   | Mouse   | Santa Cruz Biotechnology (sc-56)    |
| Anti- $\beta$ -ACTIN          | 1:5000   | Mouse   | Sigma (A5441)                       |
| Anti-HK1                      | 1:500    | Rabbit  | Cell Signaling Technology (2024)    |
| Anti-HK2                      | 1:500    | Rabbit  | Cell Signaling Technology (2867)    |
| Anti-PKM1/2                   | 1:500    | Rabbit  | Cell Signaling Technology (3190)    |
| Anti-PKM2                     | 1:500    | Rabbit  | Cell Signaling Technology (4053)    |
| Anti-PFKP                     | 1:500    | Rabbit  | Cell Signaling Technology (8164)    |
| Anti-PDHA                     | 1:500    | Rabbit  | Cell Signaling Technology (3205)    |
| Anti-LDHA                     | 1:500    | Rabbit  | Cell Signaling Technology (3582)    |
| Anti-GlcNAc                   | 1:1000   | Mouse   | Santa Cruz Biotechnology (sc-59624) |
| Anti-OXPHOS cocktail          | 1:500    | Mouse   | Abcam (ab110413)                    |
| Anti-NANOG                    | 1:1000   | Rabbit  | Cell Signaling Technology (8822)    |
| Anti-SOX2                     | 1:1000   | Rabbit  | Cell Signaling Technology (2748)    |
| Anti-OCT4                     | 1:1000   | Rabbit  | Santa Cruz Biotechnology (sc-9081)  |
| Anti-Mouse IgG (HRP-coupled)  | 1:3000   | Goat    | Santa Cruz Biotechnology (sc-2055)  |
| Anti-Rabbit IgG (HRP-coupled) | 1:3000   | Donkey  | GE Healthcare (NA934V)              |

### Supplementary Table 4 (Related to Experimental Procedures)

#### Immunoprecipitation antibodies

| Antibody             | Amount             | Species | Source                              |
|----------------------|--------------------|---------|-------------------------------------|
| Anti-OCT4            | 1 $\mu$ g          | Rabbit  | Santa Cruz Biotechnology (sc-9081)  |
| Anti-NANOG           | 1:100<br>(vol:vol) | Rabbit  | Cell Signaling Technology (8822)    |
| Anti-SOX2            | 1:100<br>(vol:vol) | Rabbit  | Cell Signaling Technology (2748)    |
| Anti-GlcNAc          | 1 $\mu$ g          | Mouse   | Santa Cruz Biotechnology (sc-59624) |
| Nonimmune Mouse IgG  | 1 $\mu$ g          | Mouse   | Santa Cruz Biotechnology (sc-2025)  |
| Nonimmune Rabbit IgG | 1 $\mu$ g          | Rabbit  | Calbiochem (12-370)                 |

## SUPPLEMENTARY METHODS

### LG-ESC Culture and Transfection

Murine LG-ESC were grown in low glucose DMEM (Life Technologies) with 15% fetal calf serum (Atlanta Biologicals) as described<sup>1</sup> + GlcN (Sigma), added at 0.8 mM unless otherwise indicated. To maintain glucose concentrations at 5.5 mM in cultures lasting more than 2 days, media glucose concentrations were measured with a blood glucose meter (Roche Diagnostics) and then media were brought to 5.5 mM by adding appropriate volumes of 25% glucose as described<sup>2</sup>. Cultures are tested for mycoplasma contamination using the MycoAlert Mycoplasma Detection Kit (Lonza).

G2KD-LG-ESC were generated by stably transfecting LG-ESC with pSUPER (OligoEngine) containing a short hairpin RNA (shRNA) against *Glut2/Slc2a2*<sup>3</sup> as described<sup>4</sup>. A control cell line, C-LG-ESC, was generated by transfecting with empty pSUPER vector. OGT-KD-LG-ESC cells were derived by stably transfecting LG-ESC with doxycycline (Dox)-inducible pSingle (Clontech) containing one of three shRNA sequences against *Ogt* mRNA that were previously reported<sup>5</sup> or a scrambled shRNA sequence (Sc-LG-ESC)<sup>6</sup>. shRNA expression was induced with 1 µg/ml Dox). 1-10 mM alloxan (Sigma) was added to LG-ESC cultures to inhibit OGT enzyme activity.

### LG-ESC Sex Determination

The sex of each cell line was determined by performing PCR of genomic DNA for *Zfy*, a Y chromosome marker as described<sup>7,8</sup> except *Glut2* as an autosomal PCR control<sup>9</sup>.

### **<sup>3</sup>H-GlcN Transport Assay**

3 x 10<sup>5</sup> cells were cultured in 35 mm dishes for 48 hr in 5.5 mM glucose media. Cells were incubated with 10 µCi D-[6-<sup>3</sup>H(N)]GlcN (PerkinElmer) in 0.8 mM GlcN with 5 mM or 16 mM 2-deoxy-D-glucose for 20 min. Reactions were stopped and cells were solubilized as described<sup>10</sup>. 950 µl of cell lysate were counted using a liquid scintillation counter. 50 µl of cell lysate were used to measure protein concentration with Protein Assay Dye Reagent (Bio-Rad).

### **2-deoxy-D-Glucose Transport Assay**

3 x 10<sup>5</sup> cells were cultured in 35 mm dishes for 48 hr in 5.5 mM glucose media, then were incubated with 0.125 mM or 0.4 mM of the fluorescent 2-deoxy-D-glucose analog, 2-NBD-glucose (2-deoxy-2-[(7-nitro-2,1,3-benzoxadiazol-4-yl)amino]-D-glucose, Cayman Chemical) in 5 mM or 16 mM 2-deoxy-D-glucose, respectively, ± 0.8 mM GlcN, for 20 min. Reactions were stopped by solubilizing cells according to the manufacturer's recommendations. 485/535 nm (excitation/emission) was measured using 50 µl of cell lysate in a 96 well plate. Protein was assayed as above.

### **Real Time RT-PCR**

Total RNA was extracted after 4 days of culture using Ultraspec reagent (Biotecx Laboratories, Friendswood, TX) and 200 ng were reverse transcribed using the High-Capacity cDNA Reverse Transcription Kit (Life Technologies). Real time PCR was performed using TaqMan PCR Master Mix (Life Technologies) as described<sup>11</sup>. Primers and FAM-labeled probes for *Nanog* (Mm 02384862), *Sox2* (Mm 00488369), *Oct4* (Mm

00658129), and VIC-labeled probe for *rRNA* (4310893E) were obtained from Life Technologies.

### **Extracellular Flux (XF) Analysis**

$3 \times 10^3$  cells were cultured for 12 hr then were washed with DMEM (0 glucose) with 143 mM NaCl and incubated for 1 hr in DMEM (5.5 mM glucose with 2 mM glutamine)  $\pm$  0.8 mM GlcN in a 37° oven. Extracellular acidification rates (ECAR) and oxygen consumption rates (OCR) were measured using a Seahorse Extracellular Flux Analyzer (XF24) 6 times over 1.5 hr. DNA was extracted with 50 mM NaOH heated to 95 °C for 30 min followed by neutralization with 1M Tris-Cl pH 6.8. DNA concentrations were measured by NanoDrop™ (Thermo Scientific).

### **Metabolic Profiling**

Six replicate 10 cm culture dishes of  $5 \times 10^6$  cells were grown under 4 culture conditions ((+)GLU(-)GLCN; (+)GLU(+)GLCN; (-)GLU(-)GLCN; (+)GLU(+)GLCN), in which cultures were grown in 5.5 mM glucose  $\pm$  0.8 mM GlcN for 47 hr, and then media were replaced with the same media, or 0 glucose media  $\pm$  GlcN, for the final h of culture. Cells were harvested by scraping into PBS, pelleted, flash frozen in liquid nitrogen, and stored at -80 °C until analysis by Metabolon, Inc. Three independent platforms were employed for untargeted metabolic profiling: ultrahigh performance liquid chromatography/tandem mass spectrometry (UHLC/MS/MS) optimized for basic species, UHLC/MS/MS optimized for acidic species, and gas chromatography/mass spectrometry (GC/MS). Samples were processed essentially as described previously<sup>12,13</sup>. For UHLC/MS/MS



analysis, aliquots were separated using a Waters Acquity UPLC and analyzed using an LTQ mass spectrometer (Thermo Fisher Scientific, Inc.), which consisted of an electrospray ionization (ESI) source and linear ion-trap (LIT) mass analyzer. The MS instrument scanned 99-1000  $m/z$  and alternated between MS and MS<sup>2</sup> scans using dynamic exclusion with approximately 6 scans per second. Derivatized samples for GC/MS were separated on a 5% phenyldimethyl silicone column with helium as the carrier gas and a temperature ramp from 60°C to 340°C and then analyzed on a Thermo-Finnigan Trace DSQ MS (Thermo Fisher Scientific, Inc.) operated at unit mass resolving power with electron impact ionization and a 50-750 atomic mass unit scan range. Metabolites were identified by automated comparison of the ion features in the experimental samples to a reference library of chemical standard entries that included retention time, molecular weight ( $m/z$ ), preferred adducts, and in-source fragments as well as associated MS spectra and curated by visual inspection for quality control using software developed at Metabolon<sup>14</sup>. Experimental samples and controls were randomized across a one-day platform run. Any missing values were assumed to be below the limits of detection and for statistical analyses and data display purposes, these values were imputed with the compound minimum (minimum value imputation). Statistical analysis of log-transformed data was performed using “R” (<http://cran.r-project.org/>). Two-way ANOVA was performed to determine main effects of glucose and GlcN and glucose:GlcN interaction. Student t-test was performed to compare data between experimental groups. Multiple comparisons were accounted for by estimating the false discovery rate (FDR) using q-values<sup>15</sup>.

## SUPPLEMENTAL REFERENCES

- 1 Jung, J. H., Wang, X. D. & Loeken, M. R. Mouse embryonic stem cells established in physiological-glucose media express the high KM Glut2 glucose transporter expressed by normal embryos. *Stem cells translational medicine* **2**, 929-934, doi:10.5966/sctm.2013-0093 (2013).
- 2 Sanders, K., Jung, J. H. & Loeken, M. R. Use of a murine embryonic stem cell line that is sensitive to high glucose environment to model neural tube development in diabetic pregnancy. *Birth defects research. Part A, Clinical and molecular teratology* **100**, 584-591, doi:10.1002/bdra.23281 (2014).
- 3 Bain, J. R., Schisler, J. C., Takeuchi, K., Newgard, C. B. & Becker, T. C. An adenovirus vector for efficient RNA interference-mediated suppression of target genes in insulinoma cells and pancreatic islets of langerhans. *Diabetes* **53**, 2190-2194 (2004).
- 4 Wang, X. D., Morgan, S. C. & Loeken, M. R. Pax3 stimulates p53 ubiquitination and degradation independent of transcription. *PLoS One* **6**, e29379, doi:10.1371/journal.pone.0029379 (2011).
- 5 Jang, H. *et al.* O-GlcNAc regulates pluripotency and reprogramming by directly acting on core components of the pluripotency network. *Cell Stem Cell* **11**, 62-74, doi:10.1016/j.stem.2012.03.001 (2012).
- 6 Wei, D. & Loeken, M. R. Increased DNA methyltransferase 3b (dnmt3b)-mediated CpG island methylation stimulated by oxidative stress inhibits expression of a gene required for neural tube and neural crest development in diabetic pregnancy. *Diabetes* **63**, 3512-3522, doi:10.2337/db14-0231 (2014).

- 7 Pani, L., Horal, M. & Loeken, M. R. Rescue of neural tube defects in Pax-3-deficient embryos by p53 loss of function: implications for Pax-3- dependent development and tumorigenesis. *Genes Dev* **16**, 676-680, doi:10.1101/gad.969302 (2002).
- 8 Sah, V. P. *et al.* A subset of p53-deficient embryos exhibit exencephaly. *Nat Genet* **10**, 175-180 (1995).
- 9 Guillam, M.-T. *et al.* Early diabetes and abnormal postnatal pancreatic islet development in mice lacking Glut-2. *Nature Genetics* **17**, 327-330 (1997).
- 10 Uldry, M., Ibberson, M., Hosokawa, M. & Thorens, B. GLUT2 is a high affinity glucosamine transporter. *FEBS Lett* **524**, 199-203 (2002).
- 11 Chang, T. I. *et al.* Oxidant regulation of gene expression and neural tube development: Insights gained from diabetic pregnancy on molecular causes of neural tube defects. *Diabetologia* **46**, 538-545 (2003).
- 12 Lawton, K. A. *et al.* Analysis of the adult human plasma metabolome. *Pharmacogenomics* **9**, 383-397, doi:10.2217/14622416.9.4.383 (2008).
- 13 Sreekumar, A. *et al.* Metabolomic profiles delineate potential role for sarcosine in prostate cancer progression. *Nature* **457**, 910-914, doi:10.1038/nature07762 (2009).
- 14 Dehaven, C. D., Evans, A. M., Dai, H. & Lawton, K. A. Organization of GC/MS and LC/MS metabolomics data into chemical libraries. *Journal of cheminformatics* **2**, 9, doi:10.1186/1758-2946-2-9 (2010).
- 15 Storey, J. D. & Tibshirani, R. Statistical significance for genomewide studies. *Proc Natl Acad Sci U S A* **100**, 9440-9445, doi:10.1073/pnas.1530509100 (2003).
